# Supplementary material
Source: MDPI journal article supplement (https://www.mdpi.com/2076-0760/11/10/466)
Supplement: s1 [file s1]

## **Supplemental Material Online**

### **Big Five personality factors in relation to coping with contact restrictions during the COVID-19 pandemic: A small sample study**

Martin Weiß, Johannes Rodrigues, & Johannes Hewig

**Table S1.** Reliabilities (Rel; Cronbach's  $\alpha$ ), means ( $M$ ) and standard deviations ( $SD$ ) for the COVID-19 restrictions coping questions, Big Five factors (extraversion, neuroticism, conscientiousness), and affect (positive, negative) regarding the three measurements (T0, T1, and T2).

|                          | T0 ( $N = 51$ ) |      |      | T1 ( $N = 36$ ) |      |      | T2 ( $N = 32$ ) |      |      |
|--------------------------|-----------------|------|------|-----------------|------|------|-----------------|------|------|
|                          | Rel             | $M$  | $SD$ | Rel             | $M$  | $SD$ | Rel             | $M$  | $SD$ |
| coping with restrictions | .85             | 4.65 | .79  | .89             | 4.65 | .85  | .86             | 4.66 | .83  |
| extraversion             | .79             | 4.44 | 1.13 | .69             | 4.35 | .80  | .84             | 4.52 | .99  |
| neuroticism              | .80             | 4.29 | 1.25 | .67             | 4.28 | 1.14 | .82             | 4.45 | 1.23 |
| conscientiousness        | .58             | 5.26 | .95  | .72             | 5.33 | 1.03 | .72             | 5.58 | .94  |
| positive affect          | .83             | 2.92 | .64  | .85             | 3.07 | .56  | .80             | 3.12 | .53  |
| negative affect          | .83             | 1.58 | .50  | .80             | 1.47 | .43  | .86             | 1.48 | .48  |

**Table S2.** Intercorrelation matrix of all Big Fives factors, positive and negative affect and coping with contact restrictions.

| Variable   | 1    | 2    | 3    | 4    | 5    | 6    | 7    | 8    | 9    | 10   | 11   | 12   | 13   | 14   | 15   | 16   | 17   | 18   | 19   | 20   | 21   | 22  | 23  |
|------------|------|------|------|------|------|------|------|------|------|------|------|------|------|------|------|------|------|------|------|------|------|-----|-----|
| T0_E (1)   | —    |      |      |      |      |      |      |      |      |      |      |      |      |      |      |      |      |      |      |      |      |     |     |
| T1_E (2)   | .76  | —    |      |      |      |      |      |      |      |      |      |      |      |      |      |      |      |      |      |      |      |     |     |
| T2_E (3)   | .86  | .78  | —    |      |      |      |      |      |      |      |      |      |      |      |      |      |      |      |      |      |      |     |     |
| T0_C (4)   | -.05 | -.05 | -.01 | —    |      |      |      |      |      |      |      |      |      |      |      |      |      |      |      |      |      |     |     |
| T1_C (5)   | -.24 | -.26 | -.2  | .81  | —    |      |      |      |      |      |      |      |      |      |      |      |      |      |      |      |      |     |     |
| T2_C (6)   | -.13 | -.1  | -.09 | .77  | .89  | —    |      |      |      |      |      |      |      |      |      |      |      |      |      |      |      |     |     |
| T0_A (7)   | .04  | .09  | .06  | .14  | .05  | -.1  | —    |      |      |      |      |      |      |      |      |      |      |      |      |      |      |     |     |
| T1_A (8)   | -.01 | -.05 | -.12 | .09  | -.03 | -.07 | .75  | —    |      |      |      |      |      |      |      |      |      |      |      |      |      |     |     |
| T2_A (9)   | .    | .07  | -.14 | -.09 | -.1  | -.24 | .69  | .73  | —    |      |      |      |      |      |      |      |      |      |      |      |      |     |     |
| T0_O (10)  | .14  | .09  | .19  | -.03 | .02  | .12  | .1   | -.18 | -.37 | —    |      |      |      |      |      |      |      |      |      |      |      |     |     |
| T1_O (11)  | .2   | .31  | .27  | .08  | -.02 | .13  | .1   | -.1  | -.28 | .78  | —    |      |      |      |      |      |      |      |      |      |      |     |     |
| T2_O (12)  | .11  | .19  | .3   | .16  | .1   | .19  | .01  | -.18 | -.36 | .79  | .9   | —    |      |      |      |      |      |      |      |      |      |     |     |
| T0_N (13)  | .12  | .15  | .12  | -.07 | -.25 | -.45 | .1   | -.13 | -.13 | .16  | .04  | .06  | —    |      |      |      |      |      |      |      |      |     |     |
| T1_N (14)  | .08  | .1   | .09  | -.21 | -.3  | -.47 | -.1  | -.12 | -.17 | .18  | .09  | .15  | .92  | —    |      |      |      |      |      |      |      |     |     |
| T2_N (15)  | .09  | .11  | .06  | -.25 | -.31 | -.32 | -.01 | .04  | -.06 | .08  | .04  | .12  | .88  | .89  | —    |      |      |      |      |      |      |     |     |
| T0_PA (16) | -.01 | -.06 | .05  | .56  | .45  | .4   | -.03 | -.02 | -.07 | .07  | -.02 | .06  | -.14 | -.27 | -.35 | —    |      |      |      |      |      |     |     |
| T1_PA (17) | .12  | .15  | .21  | .48  | .42  | .38  | -.01 | .02  | .01  | .15  | .29  | .35  | -.26 | -.24 | -.29 | .59  | —    |      |      |      |      |     |     |
| T2_PA (18) | .12  | .11  | .06  | .35  | .19  | .38  | -.25 | -.02 | .01  | .07  | -.05 | .02  | -.47 | -.37 | -.48 | .66  | .36  | —    |      |      |      |     |     |
| T0_NA (19) | .05  | -.31 | -.06 | -.33 | -.4  | -.48 | -.13 | -.02 | -.11 | -.1  | -.21 | -.18 | .25  | .23  | .21  | -.1  | -.27 | -.26 | —    |      |      |     |     |
| T1_NA (20) | -.15 | -.12 | .02  | -.13 | -.2  | -.21 | -.15 | -.3  | -.33 | .28  | .16  | .24  | .36  | .35  | .28  | -.12 | -.27 | -.31 | .53  | —    |      |     |     |
| T2_NA (21) | -.19 | -.27 | -.16 | .04  | -.1  | -.26 | -.09 | -.07 | -.16 | .22  | .09  | .07  | .42  | .46  | .21  | .15  | .05  | -.09 | .72  | .53  | —    |     |     |
| T0_CO (22) | -.34 | -.11 | -.22 | .32  | .44  | .52  | -.14 | -.02 | .01  | -.03 | .12  | .19  | -.43 | -.27 | -.24 | .37  | .45  | .5   | -.44 | -.22 | -.14 | —   |     |
| T1_CO (23) | -.1  | -.06 | -.08 | .51  | .48  | .57  | -.03 | -.01 | -.03 | -.13 | .    | .11  | -.4  | -.32 | -.21 | .46  | .48  | .47  | -.42 | -.44 | -.27 | .85 | —   |
| T2_CO (24) | -.09 | -.08 | -.14 | .43  | .46  | .57  | .02  | .06  | .13  | -.2  | -.03 | .03  | -.61 | -.52 | -.4  | .39  | .38  | .56  | -.58 | -.51 | -.41 | .84 | .91 |

*Note.* E = Extraversion, C = Conscientiousness, A = Agreeableness, O = Openness, N = Neuroticism, PA = Positive Affect, NA = Negative Affect, CO = Coping. All correlations with  $r \geq .32$  or  $r \leq -.32$  are significant at  $p < .05$ .

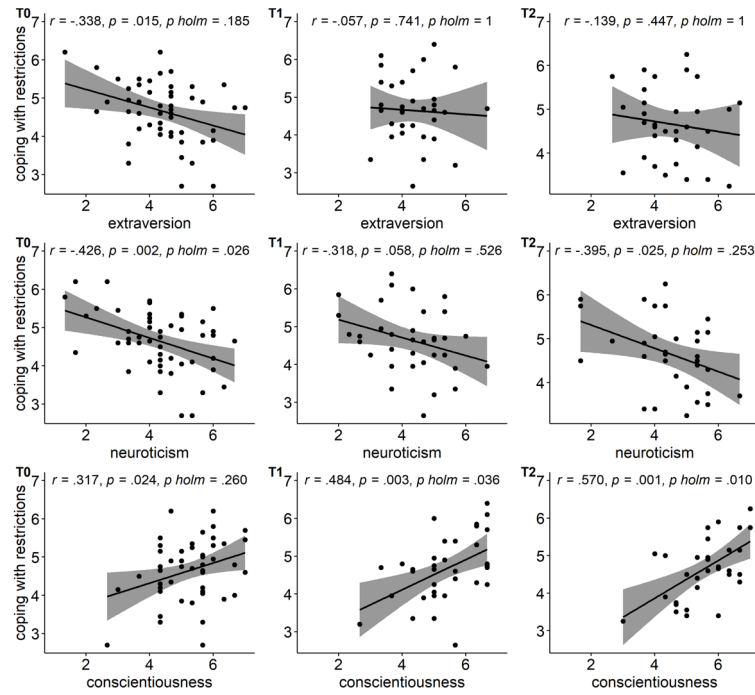

**Figure S1.** Correlations between extraversion, neuroticism, conscientiousness, and the questionnaire regarding coping with contact restrictions during the COVID-19 pandemic. T0, T1, and T2 indicate the times of measurement and the shaded areas represent the 95% CI.

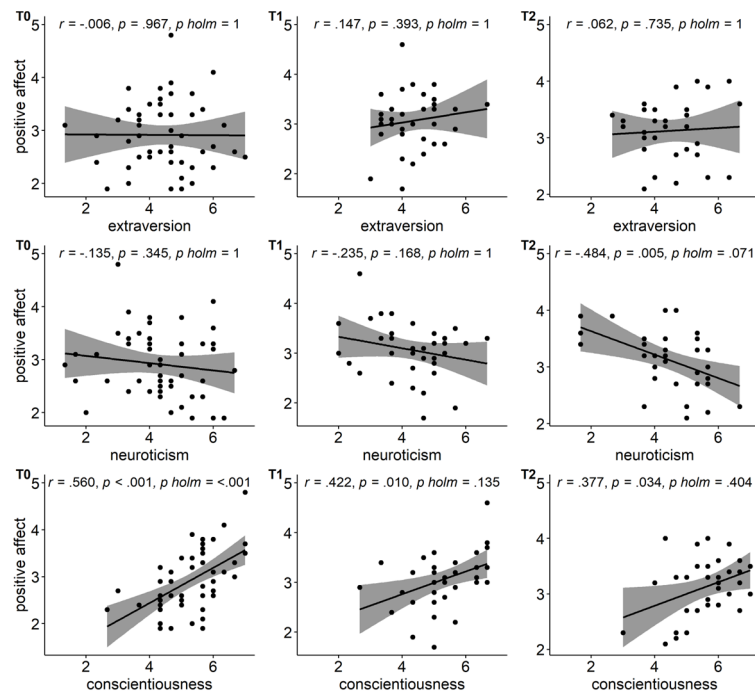

**Figure S2.** Correlations between extraversion, neuroticism, conscientiousness, and positive affect (PANAS) during the COVID-19 pandemic. T0, T1, and T2 indicate the times of measurement. Shaded areas represent the 95% CI.

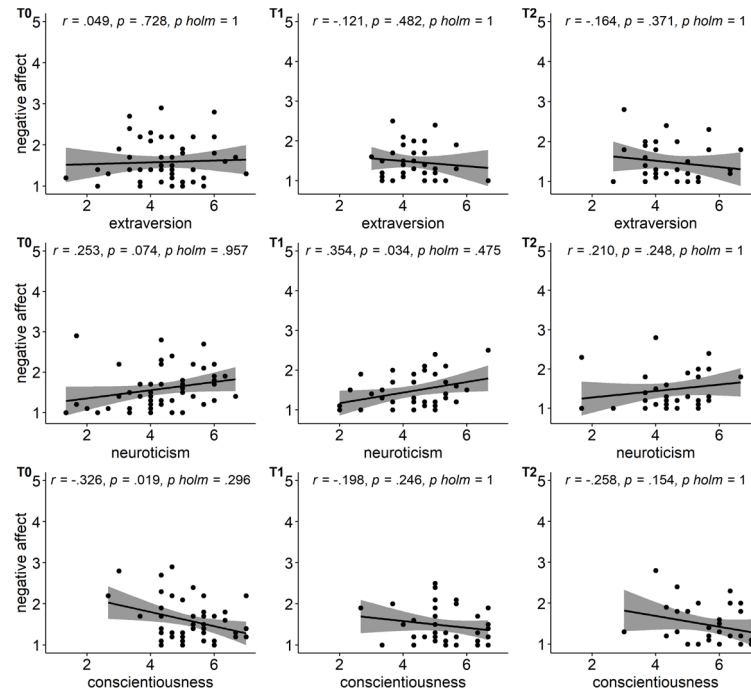

**Figure S3.** Correlations between extraversion, neuroticism, conscientiousness, and negative affect (PANAS) during the COVID-19 pandemic. T0, T1, and T2 indicate the times of measurement. Shaded areas represent the 95% CI.
